# Supplementary material for: Accuracy of the modified Global Burden of Disease International Classification of Diseases coding methods for identifying sepsis: A prospective multicentre cohort study
Source: Research Square preprint supplement (doi:10.21203/rs.3.rs-6198956/v1), 2025-05-06
Supplement: Supplementary file 1 [file 0dc02c806f2e5dea8e580b76.docx]

# **Additional File 1**

# **Accuracy of the modified Global Burden of Disease International Classification of Diseases coding methods for identifying sepsis: A prospective multicentre cohort study**

Ashwani Kumar1, Bala Venkatesh1,2, Simon Finfer1,3, Anthony Delaney1,4, Kelly Thompson1,5, Paul M Middleton6,15, Anders Aneman6, Kavitha Shetty7, Deepak Bhonagiri8, Manoj Saxena1,9, Frank M.P. van Haren9,10, Celia Bradford11, Graham Reece12, Simon Rodda13, Candice Mackellar6, Francess Bass1,4, Lewis Tsang7, Sandra Li6, Raymond Kwok9, Alexander Buckley4, Angela Zou4, Swathi Sridharan4, David Hu4, Mark Iskandar4, Sarah Frost4, Tori Headington4, Giuliana Connor8, Anthony Klironomos6, Sana Shan1, Yang Li1, Belinda Anderson9, Rebecca Sidoli9, Deborah Inskip9, Matthew Lam9, Garnette Fuller9, Christopher Yu11, Bridget Sigurdson11, Richard McNulty12,14, Maeda Sadeghpour12, Laurent Billot1, and Naomi Hammond1,4

1The George Institute for Global Health, University of New South Wales, Australia

2Princess Alexandra Hospital, Queensland, Australia

3School of Public Health, Imperial College London, London, United Kingdom

4Royal North Shore Hospital, NSW, Australia

5NepeanBlue Mountains LHD, NSW, Australia

6Liverpool Hospital, NSW, Australia

7Fairfield hospital, NSW, Australia

8Campbelltown Hospital, NSW, Australia

9St. George Hospital, NSW, Australia

10College of Health and Medicine, Australian National University, Canberra

11Sydney Adventist Hospital, NSW, Australia

12Blacktown Hospital, NSW, Australia

13Bowral Hospital, NSW, Australia

14Western Sydney University, NSW, Australia

15South Western Emergency Research Institute

**Corresponding author:** Ashwani Kumar, akumar@georgeinstitute.org.au

ORCID: 0000-0002-4787-7833

The George Institute for Global Health, Level 18, International Towers 3, 300 Barangaroo Ave, Barangaroo NSW 2000 Australia

**List of ICD codes used for various methods**

Supplementary Table 1 ICD codes list for the explicit modified GBD method (N=25)

| ICD Code | Description |
| --- | --- |
| A02.1 | Salmonella sepsis |
| A20.7 | Septicaemic plague |
| A21.7 | Generalized tularaemia |
| A22.7 | Anthrax sepsis |
| A24.1 | Acute and fulminating melioidosis |
| A26.7 | Erysipelpthrix sepsis |
| A28.2 | Extraintestinal yersiniosis |
| A32.7 | Listerial sepsis |
| A39.4 | Meningococcemia, unspecified |
| A40 | Streptococcal sepsis |
| A41.0-41.2 | Sepsis due to any Staphylococcus |
| A41.3 | Sepsis due to Haemophilus influenzae |
| A41.4 | Sepsis due to anaerobes |
| A41.5 | Sepsis due to other and unspecified Gram-negative organisms |
| A41.8 | Other specified sepsis |
| A41.9 | Sepsis, unspecified |
| A42.7 | Actinomycotic sepsis |
| A54.86 | Gonococcal sepsis |
| B00.7 | Disseminated herpes viral disease |
| B37.7 | Candidal sepsis |
| O85 | Puerperal sepsis |
| R57.2 | Septic Shock |
| R65.1 | Systemic Inflammatory Response Syndrome of infectious origin with organ failure |

GBD: Global Burden of Disease; ICD: International Classification of Diseases

Supplementary Table 2 Infection code list for the implicit and implicit plus modified GBD and Angus methods

| ICD Code | Description | Modified GBD | Angus |
| --- | --- | --- | --- |
| A00 | Cholera | Yes | Yes |
| A01 | Typhoid fever | Yes | Yes |
| A02 | Other salmonella infections | Yes | Yes |
| A03 | Shigellosis | Yes | Yes |
| A04 | Other bacterial intestinal infections | Yes | Yes |
| A05 | Other bacterial food-borne intoxications | Yes | Yes |
| A06 | Amebiasis | Yes | No |
| A07 | Other protozoal intestinal diseases | Yes | No |
| A08 | Viral and other specified intestinal infections | Yes | Yes |
| A09 | Diarrhoea and gastroenteritis, presumed infectious origin | Yes | Yes |
| A15 | Respiratory tuberculosis, bacteriologically and histologically confirmed | No | Yes |
| A16 | Respiratory tuberculosis, confirmed bacteriologically or histologically | No | Yes |
| A17 | Tuberculosis of nervous system | No | Yes |
| A18 | Tuberculosis of other organs | No | Yes |
| A19 | Miliary tuberculosis | Yes | Yes |
| A20 | Plague | Yes | Yes |
| A21 | Tularaemia | Yes | Yes |
| A22 | Anthrax | Yes | Yes |
| A23 | Brucellosis | Yes | Yes |
| A24 | Glanders and melioidosis | Yes | Yes |
| A25 | Rat-bite fevers | Yes | Yes |
| A26 | Erysipeloid | Yes | No |
| A27 | Leptospirosis | Yes | Yes |
| A28 | Other zoonotic bacterial diseases, not elsewhere classified | Yes | Yes |
| A30 | Leprosy | Yes | Yes |
| A31 | Infection due to other mycobacteria | Yes | Yes |
| A32 | Listeriosis | Yes | Yes |
| A33 | Tetanus neonatorum | No | Yes |
| A34 | Obstetrical tetanus | No | Yes |
| A35 | Other tetanus | No | Yes |
| A36 | Diphtheria | Yes | Yes |
| A37 | Whooping cough | Yes | Yes |
| A38 | Scarlet fever | Yes | Yes |
| A39 | Meningococcal meningitis | Yes | Yes |
| A40 | Streptococcal sepsis | No | Yes |
| A41 | Other sepsis | No | Yes |
| A42 | Actinomycosis | Yes | Yes |
| A43 | Nocardiosis | Yes | Yes |
| A44 | Bartonellosis | Yes | Yes |
| A46 | Erysipelas | Yes | Yes |
| A48 | Other bacterial diseases, elsewhere classified | Yes | Yes |
| A48.0 | Gas gangrene | Yes | Yes |
| A48.1 | Legionnaires disease | Yes | Yes |
| A48.3 | Toxic shock syndrome | Yes | Yes |
| A49 | Bacterial infection of unspecified site | Yes | No |
| A49.9 | Bacterial infection, unspecified | Yes | Yes |
| A51 | Early syphilis | No | Yes |
| A52 | Late syphilis | No | Yes |
| A53 | Other and unspecified syphilis | No | Yes |
| A54 | Gonococcal infection | Yes | Yes |
| A59 | Trichomoniasis | Yes | Yes |
| A65 | Nonvenereal syphilis | No | Yes |
| A66 | Yaws | No | Yes |
| A67 | Pinta (carate) | No | Yes |
| A69 | Other spirochaetal infections | No | Yes |
| A69.0 | Necrotising ulcerative stomatitis | Yes | No |
| A69.1 | Other Vincent's infections | Yes | No |
| A69.9 | Spirochaetal infection, unspecified | Yes | No |
| A70 | Chlamydia psittaci infections | Yes | No |
| A74 | Other diseases caused by chlamydia | Yes | No |
| A75 | Typhus fever | Yes | No |
| A77 | Spotted fever (tick-borne rickettsioses) | Yes | No |
| A78 | Q fever | Yes | No |
| A79 | Other rickettsioses | Yes | No |
| A80 | Acute poliomyelitis | Yes | No |
| A81 | Atypical virus infections of CNS | Yes | No |
| A83 | Mosquito-borne viral encephalitis | Yes | No |
| A84 | Tick-borne viral encephalitis | Yes | No |
| A85 | Other viral encephalitis, not elsewhere classified | Yes | No |
| A86 | Unspecified viral encephalitis | Yes | No |
| A87 | Viral meningitis | Yes | No |
| A88 | Other viral infections of CNS, not elsewhere classified | Yes | No |
| A89 | Unspecified viral infection of CNS | Yes | No |
| A90 | Dengue fever | Yes | No |
| A91 | Dengue haemorrhagic fever | Yes | No |
| A92 | Other mosquito-borne viral fevers | Yes | No |
| A93 | Other arthropod-borne viral fevers, not elsewhere classified | Yes | No |
| A94 | Unspecified arthropod-borne viral fever | Yes | No |
| A95 | Yellow fever | Yes | No |
| A96 | Arenaviral haemorrhagic fever | Yes | No |
| A98 | Other viral haemorrhagic fever, not elsewhere classified | Yes | No |
| A99 | Unspecified viral haemorrhagic fever | Yes | No |
| B00 | Herpes viral [herpes simplex] infections | Yes | No |
| B01 | Varicella | Yes | No |
| B02 | Zoster | Yes | No |
| B03 | Smallpox | Yes | No |
| B04 | Monkeypox | Yes | No |
| B05 | Measles | Yes | No |
| B06 | Rubella | Yes | No |
| B08 | Other viral infections characterized by skin and mucous membrane lesions, not elsewhere classified | Yes | No |
| B09 | Unspecified viral infection characterized by skin and mucous membrane lesions | Yes | No |
| B10 | Other human herpesviruses | Yes | No |
| B25 | Cytomegaloviral disease | Yes | No |
| B26 | Mumps | Yes | No |
| B27 | Infectious mononucleosis | Yes | No |
| B33 | Other viral diseases, not elsewhere classified | Yes | No |
| B34 | Viral infection of unspecified site | Yes | No |
| B35 | Dermatophytosis | No | Yes |
| B36 | Other superficial mycoses | No | Yes |
| B37 | Candidiasis | Yes | Yes |
| B38 | Coccidioidomycosis | Yes | Yes |
| B38.7 | Disseminated coccidioidomycosis | Yes | Yes |
| B39 | Histoplasmosis | Yes | Yes |
| B39.3 | Disseminated histoplasmosis capsulati | Yes | Yes |
| B40 | Blastomycosis | Yes | Yes |
| B40.7 | Disseminated blastomycosis | Yes | Yes |
| B41 | Paracoccidioidomycosis | Yes | Yes |
| B41.7 | Disseminated paracoccidioidomycosis | Yes | Yes |
| B42 | Sporotrichosis | Yes | Yes |
| B42.7 | Disseminated sporotrichosis | Yes | Yes |
| B43 | Chromomycosis and phaeomycotic abscess | Yes | Yes |
| B44 | Aspergillosis | Yes | Yes |
| B44.7 | Disseminated aspergillosis | Yes | Yes |
| B45 | Cryptococcosis | Yes | Yes |
| B45.7 | Disseminated cryptococcosis | Yes | Yes |
| B46 | Zygomycosis | Yes | Yes |
| B46.4 | Disseminated mucormycosis | Yes | Yes |
| B47 | Mycetoma | No | Yes |
| B48 | Other mycoses, not elsewhere classified | Yes | Yes |
| B49 | Unspecified mycosis | Yes | Yes |
| B50 | Plasmodium falciparum malaria | Yes | No |
| B50.8 | Other severe and complicated Plasmodium falciparum malaria | Yes | No |
| B54 | Unspecified malaria | Yes | No |
| B55 | Leishmaniasis | Yes | No |
| B57 | Chagas Disease | Yes | No |
| B58 | Toxoplasmosis | Yes | No |
| B59 | Pneumocystosis | Yes | No |
| B60 | Other protozoal diseases, not elsewhere classified | Yes | No |
| B64 | Unspecified protozoal disease | Yes | No |
| B67 | Echinococcosis | Yes | No |
| B95 | Streptococcus, Staphylococcus, and Enterococcus as the cause of diseases classified elsewhere | Yes | No |
| B96 | Other bacterial agents as the cause of diseases classified elsewhere | Yes | No |
| B97 | Viral agents as the cause of diseases classified elsewhere | Yes | No |
| B99 | Other and unspecified infectious diseases | Yes | No |
| G00 | Bacterial meningitis, not elsewhere classified | Yes | Yes |
| G01 | Meningitis in bacterial diseases classified elsewhere | Yes | Yes |
| G02 | Meningitis in other infectious and parasitic diseases classified elsewhere | Yes | Yes |
| G03 | Meningitis due to other and unspecified causes | Yes | Yes |
| G04 | Encephalitis, myelitis, and encephalomyelitis | Yes | Yes |
| G05 | Encephalitis, myelitis, and encephalomyelitis in diseases classified elsewhere | Yes | Yes |
| G06 | Intracranial and intraspinal abscess and granuloma | Yes | Yes |
| G07 | Intracranial and intraspinal abscess and granuloma in diseases classified elsewhere | Yes | Yes |
| G08 | Intracranial and intraspinal phlebitis and thrombophlebitis | Yes | Yes |
| G09 | Sequelae of inflammatory diseases of central nervous system | No | Yes |
| H05.01 | Cellulitis of orbit | Yes | No |
| H05.02 | Osteomyelitis of orbit | Yes | No |
| H05.03 | Periostitis of orbit | Yes | No |
| H60.2 | Malignant otitis externa | Yes | No |
| H70.0 | Acute mastoiditis | Yes | No |
| I00 | Rheumatic fever without heart involvement | Yes | No |
| I26.01 | Septic pulmonary embolism with acute cor pulmonale | Yes | No |
| I26.90 | Septic pulmonary embolism without acute cor pulmonale | Yes | No |
| I30 | Acute pericarditis | No | Yes |
| I33 | Acute and subacute endocarditis | Yes | Yes |
| I38 | Endocarditis, valve unspecified | Yes | No |
| I39 | Endocarditis and heart valve disorders in diseases classified elsewhere | Yes | No |
| I40.0 | Infective myocarditis | Yes | No |
| I76 | Septic non-pulmonary arterial embolism | Yes | No |
| I80 | Phlebitis and thrombophlebitis | No | Yes |
| I96 | Gangrene, not elsewhere classified | Yes | No |
| J01 | Acute sinusitis | Yes | Yes |
| J02 | Acute pharyngitis | Yes | Yes |
| J03 | Acute tonsillitis | Yes | Yes |
| J04 | Acute laryngitis and tracheitis | Yes | Yes |
| J05 | Acute obstructive laryngitis (croup) and epiglottitis | Yes | Yes |
| J06 | Acute upper respiratory infections of multiple and unspecified sites | Yes | Yes |
| J09 | Influenza due to certain identified influenza viruses | Yes | No |
| J10 | Influenza due to other identified influenza virus | Yes | No |
| J11 | Influenza due to unidentified influenza virus | Yes | No |
| J12 | Viral pneumonia, not elsewhere classified | Yes | No |
| J13 | Pneumonia due to Streptococcus pneumoniae | Yes | Yes |
| J14 | Pneumonia due to Haemophilus influenzae | Yes | Yes |
| J15 | Bacterial pneumonia, not elsewhere classified | Yes | Yes |
| J16 | Pneumonia due to other infectious organisms, not elsewhere classified | Yes | Yes |
| J17 | Pneumonia in diseases classified elsewhere | Yes | Yes |
| J18 | Pneumonia, organism unspecified | Yes | Yes |
| J20 | Acute bronchitis | Yes | No |
| J21 | Acute bronchiolitis | Yes | No |
| J22 | Unspecified acute lower respiratory infection | Yes | No |
| J36 | Peritonsillar abscess | Yes | No |
| J39.0 | Retropharyngeal and parapharyngeal abscess | Yes | No |
| J39.1 | Other abscess of pharynx | Yes | No |
| J44 | Chronic obstructive pulmonary disease with acute lower respiratory infection | No | Yes |
| J44.1 | Chronic obstructive pulmonary disease with acute exacerbation, unspecified | No | Yes |
| J47 | Bronchiectasis | No | Yes |
| J85 | Abscess of lung and mediastinum | Yes | Yes |
| J86 | Pyothorax | Yes | Yes |
| K35 | Acute appendicitis | Yes | Yes |
| K36 | Other appendicitis | Yes | Yes |
| K37 | Unspecified appendicitis | Yes | Yes |
| K57 | Diverticulitis disease of intestine | Yes | Yes |
| K61 | Abscess of anal and rectal regions | Yes | Yes |
| K63.0 | Abscess of intestine | Yes | Yes |
| K63.1 | Perforation of intestine (nontraumatic) | Yes | Yes |
| K65 | Peritonitis | Yes | Yes |
| K75.0 | Abscess of liver | Yes | Yes |
| K81.0 | Acute cholecystitis | Yes | Yes |
| K81.2 | Acute cholecystitis with chronic cholecystitis | Yes | No |
| K83.0 | Cholangitis | Yes | No |
| K95.01 | Infection due to gastric band procedure | Yes | No |
| K95.81 | Infection due to other bariatric procedure | Yes | No |
| L02 | Cutaneous abscess, furuncle, and carbuncle | Yes | No |
| L03 | Cellulitis | Yes | Yes |
| L04 | Acute lymphadenitis | Yes | Yes |
| L08 | Other local infections of skin and subcutaneous tissue | Yes | Yes |
| L88 | Pyoderma gangrenosum | No | Yes |
| M00 | Pyogenic arthritis | Yes | Yes |
| M01 | Direction infections of joint in infectious and parasitic diseases classified elsewhere | Yes | Yes |
| M86 | Osteomyelitis | Yes | Yes |
| N10 | Acute pyelonephritis | Yes | Yes |
| N11 | Chronic tubulointerstitial nephritis | No | Yes |
| N12 | Tubulointerstitial nephritis, not specified as acute or chronic | No | Yes |
| N15.1 | Renal and perinephric abscess | Yes | No |
| N30 | cystitis | Yes | No |
| N34 | Urethritis and urethral syndrome | No | Yes |
| N39.0 | Urinary tract infection, site not specified | Yes | Yes |
| N41.0 | Acute prostatitis | Yes | Yes |
| N41.2 | Abscess of prostate | Yes | Yes |
| N41.3 | Prostatocystitis | Yes | Yes |
| N45 | Orchitis and epididymitis | Yes | No |
| N70 | Salpingitis and oophoritis | Yes | Yes |
| N71 | Inflammatory disease of uterus, except cervix | Yes | Yes |
| N72 | Inflammatory disease of cervix uteri | Yes | Yes |
| N73 | Other female pelvic inflammatory diseases | Yes | Yes |
| N74 | Female pelvic inflammatory disorders in diseases classified elsewhere | Yes | Yes |
| N77 | Vulvovaginal ulceration and inflammation in diseases classified elsewhere | No | Yes |
| N98.0 | Infection associated with artificial insemination | Yes | No |
| O03.0 | Genital tract and pelvic infection following incomplete spontaneous abortion | Yes | No |
| O03.5 | Genital tract and pelvic infection following complete or unspecified spontaneous abortion | Yes | No |
| O03.88 | Urinary tract infection following complete or unspecified spontaneous abortion | Yes | No |
| O04.5 | Genital tract and pelvic infection following (induced) termination of pregnancy | Yes | No |
| O04.88 | Urinary tract infection following (induced) termination of pregnancy | Yes | No |
| O07.38 | Urinary tract infection following failed attempted termination of pregnancy | Yes | No |
| O08.0 | Genital tract and pelvic infection following ectopic and molar pregnancy | Yes | No |
| O08.83 | Urinary tract infection following ectopic and molar pregnancy | Yes | No |
| O23 | Infections of genitourinary tract in pregnancy | Yes | No |
| O75.3 | Other infection during labour | Yes | No |
| O86 | Other puerperal infections | Yes | No |
| O88.3 | Obstetric pyemic and septic embolism | Yes | No |
| O91 | Infections of breast associated with pregnancy, the puerperium and lactation | Yes | No |
| O98 | Maternal infectious and parasitic diseases classifiable elsewhere but complicating pregnancy, childbirth, and the puerperium | Yes | No |
| R78.81 | Bacteraemia NOS | Yes | No |
| T80.2 | Sepsis following infusion, transfusion, or therapeutic injection | Yes | No |
| T81.4 | Infection following a procedure, not elsewhere classified | Yes | Yes |
| T82.6 | Infection and inflammatory reaction due to cardiac valve prosthesis | Yes | Yes |
| T82.7 | Infection and inflammatory reaction due to other cardiac and vascular devices, implants, and grafts | Yes | Yes |
| T83.5 | Infection and inflammatory reaction due to prosthetic device, implant, and graft in urinary system | Yes | Yes |
| T83.6 | Infection and inflammatory reaction due to prosthetic device, implant, and graft in genital tract | Yes | Yes |
| T84.5 | Infection and inflammatory reaction due to internal joint prosthesis | Yes | Yes |
| T84.6 | Infection and inflammatory reaction due to internal fixation device | Yes | Yes |
| T84.7 | Infection and inflammatory reaction due to other internal orthopaedic prosthetic devices, implants, and grafts | Yes | Yes |
| T85.7 | Infection and inflammatory reaction due to other internal prosthetic devices, implants, and grafts | Yes | Yes |
| T88.0 | Sepsis following immunization | Yes | Yes |
| U04 | Severe Acute Respiratory Syndrome (SARS) | Yes | No |

NOS: Not otherwise specified; CNS: Central Nervous System; GBD: Global Burden of Disease; ICD: International Classification of Diseases

Supplementary Table 3 Organ dysfunction codes list for the implicit and implicit plus modified GBD and Angus methods

| ICD Code | Description | Modified GBD | Angus |
| --- | --- | --- | --- |
| D65 | Disseminated intravascular coagulation [defibrination syndrome] | Yes | Yes |
| D69.5 | Secondary thrombocytopenia | Yes | Yes |
| D69.6 | Thrombocytopenia, unspecified | No | Yes |
| D69.8 | Other specified haemorrhage conditions | No | Yes |
| D69.9 | Haemorrhagic condition, unspecified | No | Yes |
| E87.2 | Acidosis | Yes | No |
| F05 | Delirium, not induced by alcohol and other psychoactive Substances | No | Yes |
| G93.1 | Anoxic brain damage, not elsewhere classified | No | Yes |
| G93.4 | Other and unspecified encephalopathy | Yes | No |
| I46 | Cardiac arrest | Yes | No |
| I95 | Hypotension Block | No | Yes |
| I95.9 | Hypotension, unspecified | Yes | No |
| J80 | Acute respiratory distress syndrome | Yes | No |
| J95.2 | Acute pulmonary insufficiency following nonthoracic surgery | Yes | No |
| J96 | Respiratory failure, not elsewhere classified | Yes | No |
| 569 | Continuous ventilatory support | No | Yes |
| J96.0 | Acute respiratory failure | Yes | No |
| J96.2 | Acute and chronic respiratory failure | Yes | No |
| J96.9 | Respiratory failure, unspecified | Yes | No |
| K72.0 | Acute and subacute hepatic failure | Yes | Yes |
| K72.9 | Hepatic failure, unspecified | Yes | No |
| N00 | Acute nephritic syndrome | Yes | No |
| N17 | Acute kidney failure | Yes | Yes |
| R09.02 | Hypoxemia | Yes | No |
| R09.2 | Respiratory arrest | Yes | No |
| R40.0 | Somnolence | Yes | No |
| R40.1 | Stupor | Yes | No |
| R40.2 | Coma | Yes | No |
| R40.20 | Unspecified coma | Yes | No |
| R41.82 | Altered mental status, unspecified | Yes | No |
| R55 | Syncope and collapse | Yes | No |
| R57 | Shock, not elsewhere classified | Yes | No |
