# Supplementary material for: Accuracy of the modified Global Burden of Disease International Classification of Diseases coding methods for identifying sepsis: A prospective multicentre cohort study
Source: Research Square preprint supplement (doi:10.21203/rs.3.rs-6198956/v1), 2025-05-06
Supplement: Supplementary file 2 [file 4e863d15c92b0c3c3c24ee99.docx]

Additional File 4: STROBE Statement—Checklist of items that should be included in reports of **cohort studies**

# Accuracy of the modified Global Burden of Disease International Classification of Diseases coding methods for identifying sepsis: A prospective multicentre cohort study

Ashwani Kumar1, Bala Venkatesh1,2, Simon Finfer1,3, Anthony Delaney1,4, Kelly Thompson1,5, Paul M Middleton6,15, Anders Aneman6, Kavitha Shetty7, Deepak Bhonagiri8, Manoj Saxena1,9, Frank M.P. van Haren9,10, Celia Bradford11, Graham Reece12, Simon Rodda13, Candice Mackellar6, Francess Bass1,4, Lewis Tsang7, Sandra Li6, Raymond Kwok9, Alexander Buckley4, Angela Zou4, Swathi Sridharan4, David Hu4, Mark Iskandar4, Sarah Frost4, Tori Headington4, Giuliana Connor8, Anthony Klironomos6, Sana Shan1, Yang Li1, Belinda Anderson9, Rebecca Sidoli9, Deborah Inskip9, Matthew Lam9, Garnette Fuller9, Christopher Yu11, Bridget Sigurdson11, Richard McNulty12,14, Maeda Sadeghpour12, Laurent Billot1, and Naomi Hammond1,4

1The George Institute for Global Health, University of New South Wales, Australia

2Princess Alexandra Hospital, Queensland, Australia

3School of Public Health, Imperial College London, London, United Kingdom

4Royal North Shore Hospital, NSW, Australia

5NepeanBlue Mountains LHD, NSW, Australia

6Liverpool Hospital, NSW, Australia

7Fairfield hospital, NSW, Australia

8Campbelltown Hospital, NSW, Australia

9St. George Hospital, NSW, Australia

10College of Health and Medicine, Australian National University, Canberra

11Sydney Adventist Hospital, NSW, Australia

12Blacktown Hospital, NSW, Australia

13Bowral Hospital, NSW, Australia

14Western Sydney University, NSW, Australia

15South Western Emergency Research Institute

**Corresponding author:** Ashwani Kumar, akumar@georgeinstitute.org.au

ORCID: 0000-0002-4787-7833

The George Institute for Global Health, Level 18, International Towers 3, 300 Barangaroo Ave, Barangaroo NSW 2000 Australia

|  | Item No | Recommendation | Page No |
| --- | --- | --- | --- |
| **Title and abstract** | 1 | (*a*) Indicate the study’s design with a commonly used term in the title or the abstract | 1 |
| (*b*) Provide in the abstract an informative and balanced summary of what was done and what was found | 2 |
| Introduction | | | |
| Background/rationale | 2 | Explain the scientific background and rationale for the investigation being reported | 3 |
| Objectives | 3 | State specific objectives, including any prespecified hypotheses | 4 |
| Methods | | | |
| Study design | 4 | Present key elements of study design early in the paper | 4 |
| Setting | 5 | Describe the setting, locations, and relevant dates, including periods of recruitment, exposure, follow-up, and data collection | 4 |
| Participants | 6 | (*a*) Give the eligibility criteria, and the sources and methods of selection of participants. Describe methods of follow-up | 5 |
| (*b*)For matched studies, give matching criteria and number of exposed and unexposed |  |
| Variables | 7 | Clearly define all outcomes, exposures, predictors, potential confounders, and effect modifiers. Give diagnostic criteria, if applicable | 5-6 |
| Data sources/ measurement | 8* | For each variable of interest, give sources of data and details of methods of assessment (measurement). Describe comparability of assessment methods if there is more than one group | 5-6 |
| Bias | 9 | Describe any efforts to address potential sources of bias | - |
| Study size | 10 | Explain how the study size was arrived at | 4-5 |
| Quantitative variables | 11 | Explain how quantitative variables were handled in the analyses. If applicable, describe which groupings were chosen and why | 7-8 |
| Statistical methods | 12 | (*a*) Describe all statistical methods, including those used to control for confounding | 8 |
| (*b*) Describe any methods used to examine subgroups and interactions |  |
| (*c*) Explain how missing data were addressed |  |
| (*d*) If applicable, explain how loss to follow-up was addressed |  |
| (*e*) Describe any sensitivity analyses |  |
| Results | | |  |
| Participants | 13* | (a) Report numbers of individuals at each stage of study—eg numbers potentially eligible, examined for eligibility, confirmed eligible, included in the study, completing follow-up, and analysed | 8 |
| (b) Give reasons for non-participation at each stage |  |
| (c) Consider use of a flow diagram |  |
| Descriptive data | 14* | (a) Give characteristics of study participants (eg demographic, clinical, social) and information on exposures and potential confounders |  |
| (b) Indicate number of participants with missing data for each variable of interest | 8 |
| (c) Summarise follow-up time (eg, average and total amount) |  |
| Outcome data | 15* | Report numbers of outcome events or summary measures over time | 8 |

| Main results | 16 | (*a*) Give unadjusted estimates and, if applicable, confounder-adjusted estimates and their precision (eg, 95% confidence interval). Make clear which confounders were adjusted for and why they were included | 9-10 |
| --- | --- | --- | --- |
| (*b*) Report category boundaries when continuous variables were categorized |  |
| (*c*) If relevant, consider translating estimates of relative risk into absolute risk for a meaningful time period |  |
| Other analyses | 17 | Report other analyses done—eg analyses of subgroups and interactions, and sensitivity analyses | 11-13 |
| Discussion | | | |
| Key results | 18 | Summarise key results with reference to study objectives | 13-14 |
| Limitations | 19 | Discuss limitations of the study, taking into account sources of potential bias or imprecision. Discuss both direction and magnitude of any potential bias | 15 |
| Interpretation | 20 | Give a cautious overall interpretation of results considering objectives, limitations, multiplicity of analyses, results from similar studies, and other relevant evidence | 15-16 |
| Generalisability | 21 | Discuss the generalisability (external validity) of the study results | 15 |
| Other information | | | |
| Funding | 22 | Give the source of funding and the role of the funders for the present study and, if applicable, for the original study on which the present article is based | 17 |

*Give information separately for exposed and unexposed groups.
