# Supplementary material for: Accuracy of the modified Global Burden of Disease International Classification of Diseases coding methods for identifying sepsis: A prospective multicentre cohort study
Source: Research Square preprint supplement (doi:10.21203/rs.3.rs-6198956/v1), 2025-05-06
Supplement: Supplementary file 4 [file 8bd4d99df77b4fc7ba6a6be9.docx]

Additional File 3: STARD Checklist

**Accuracy of the modified Global Burden of Disease International Classification of Diseases coding methods for identifying sepsis: A prospective multicentre cohort study**

Ashwani Kumar1, Bala Venkatesh1,2, Simon Finfer1,3, Anthony Delaney1,4, Kelly Thompson1,5, Paul M Middleton6,15, Anders Aneman6, Kavitha Shetty7, Deepak Bhonagiri8, Manoj Saxena1,9, Frank M.P. van Haren9,10, Celia Bradford11, Graham Reece12, Simon Rodda13, Candice Mackellar6, Francess Bass1,4, Lewis Tsang7, Sandra Li6, Raymond Kwok9, Alexander Buckley4, Angela Zou4, Swathi Sridharan4, David Hu4, Mark Iskandar4, Sarah Frost4, Tori Headington4, Giuliana Connor8, Anthony Klironomos6, Sana Shan1, Yang Li1, Belinda Anderson9, Rebecca Sidoli9, Deborah Inskip9, Matthew Lam9, Garnette Fuller9, Christopher Yu11, Bridget Sigurdson11, Richard McNulty12,14, Maeda Sadeghpour12, Laurent Billot1, and Naomi Hammond1,4

1The George Institute for Global Health, University of New South Wales, Australia

2Princess Alexandra Hospital, Queensland, Australia

3School of Public Health, Imperial College London, London, United Kingdom

4Royal North Shore Hospital, NSW, Australia

5NepeanBlue Mountains LHD, NSW, Australia

6Liverpool Hospital, NSW, Australia

7Fairfield hospital, NSW, Australia

8Campbelltown Hospital, NSW, Australia

9St. George Hospital, NSW, Australia

10College of Health and Medicine, Australian National University, Canberra

11Sydney Adventist Hospital, NSW, Australia

12Blacktown Hospital, NSW, Australia

13Bowral Hospital, NSW, Australia

14Western Sydney University, NSW, Australia

15South Western Emergency Research Institute

**Corresponding author:** Ashwani Kumar, akumar@georgeinstitute.org.au

ORCID: 0000-0002-4787-7833

The George Institute for Global Health, Level 18, International Towers 3, 300 Barangaroo Ave, Barangaroo NSW 2000 Australia

| **Section & Topic** | **No** | **Item** | **Reported on page #** |
| --- | --- | --- | --- |
|  |  |  |  |
| **TITLE OR ABSTRACT** |  |  |  |
|  | **1** | Identification as a study of diagnostic accuracy using at least one measure of accuracy  (such as sensitivity, specificity, predictive values, or AUC) | 2 |
| **ABSTRACT** |  |  |  |
|  | **2** | Structured summary of study design, methods, results, and conclusions  (for specific guidance, see STARD for Abstracts) | 2 |
| **INTRODUCTION** |  |  |  |
|  | **3** | Scientific and clinical background, including the intended use and clinical role of the index test | 3 |
|  | **4** | Study objectives and hypotheses | 4 |
| **METHODS** |  |  |  |
| *Study design* | **5** | Whether data collection was planned before the index test and reference standard  were performed (prospective study) or after (retrospective study) | 5 |
| *Participants* | **6** | Eligibility criteria | 5 |
|  | **7** | On what basis potentially eligible participants were identified  (such as symptoms, results from previous tests, inclusion in registry) | 5 |
|  | **8** | Where and when potentially eligible participants were identified (setting, location and dates) | 6 |
|  | **9** | Whether participants formed a consecutive, random or convenience series | 6 |
| *Test methods* | **10a** | Index test, in sufficient detail to allow replication | 6-7 |
|  | **10b** | Reference standard, in sufficient detail to allow replication | 5 |
|  | **11** | Rationale for choosing the reference standard (if alternatives exist) |  |
|  | **12a** | Definition of and rationale for test positivity cut-offs or result categories  of the index test, distinguishing pre-specified from exploratory | - |
|  | **12b** | Definition of and rationale for test positivity cut-offs or result categories  of the reference standard, distinguishing pre-specified from exploratory |  |
|  | **13a** | Whether clinical information and reference standard results were available  to the performers/readers of the index test |  |
|  | **13b** | Whether clinical information and index test results were available  to the assessors of the reference standard |  |
| *Analysis* | **14** | Methods for estimating or comparing measures of diagnostic accuracy | 7 |
|  | **15** | How indeterminate index test or reference standard results were handled |  |
|  | **16** | How missing data on the index test and reference standard were handled |  |
|  | **17** | Any analyses of variability in diagnostic accuracy, distinguishing pre-specified from exploratory | 8 |
|  | **18** | Intended sample size and how it was determined | 4-5 |
| **RESULTS** |  |  |  |
| *Participants* | **19** | Flow of participants, using a diagram | 8 |
|  | **20** | Baseline demographic and clinical characteristics of participants | 9 |
|  | **21a** | Distribution of severity of disease in those with the target condition | - |
|  | **21b** | Distribution of alternative diagnoses in those without the target condition | - |
|  | **22** | Time interval and any clinical interventions between index test and reference standard | - |
| *Test results* | **23** | Cross tabulation of the index test results (or their distribution)  by the results of the reference standard | 9-10 |
|  | **24** | Estimates of diagnostic accuracy and their precision (such as 95% confidence intervals) | 9-10 |
|  | **25** | Any adverse events from performing the index test or the reference standard | - |
| **DISCUSSION** |  |  |  |
|  | **26** | Study limitations, including sources of potential bias, statistical uncertainty, and generalisability | 15 |
|  | **27** | Implications for practice, including the intended use and clinical role of the index test | 15-16 |
| **OTHER INFORMATION** |  |  |  |
|  | **28** | Registration number and name of registry | 2 |
|  | **29** | Where the full study protocol can be accessed |  |
|  | **30** | Sources of funding and other support; role of funders | 17 |
|  |  |  |  |
